# Supplementary material for: Conversion of dilute nitrous oxide (N2O) in N2 and N2–O2 mixtures by plasma and plasma-catalytic processes
Source: Royal Society of Chemistry journal article supplement (doi:10.1039/c8ra05607b), 2018-01-01
Supplement: c8ra05607b1.pdf [file c8ra05607b1.pdf]

## Conversion of dilute nitrous oxide ( $\text{N}_2\text{O}$ ) in $\text{N}_2$ and $\text{N}_2\text{-O}_2$ mixtures by plasma and plasma-catalytic processes

Xing Fan,<sup>\*a</sup> Sijing Kang,<sup>a</sup> Jian Li<sup>a</sup> and Tianle Zhu<sup>b</sup>

### Figures S1 and S2

**Figs. S1 and S2** show the effects of  $\text{N}_2\text{O}$  presence in  $\text{N}_2\text{-O}_2$  mixture on the production of NO and  $\text{NO}_2$  by discharge in plasma (**Fig. S1**) and plasma- $\text{Al}_2\text{O}_3$  reactors (**Fig. S2**) at room temperature. As can be seen, the presence of low-concentration (100 ppm)  $\text{N}_2\text{O}$  in the  $\text{N}_2\text{-O}_2$  mixture hardly affected the formation behavior of NO and  $\text{NO}_2$  in both plasma (**Fig. S1**) and plasma- $\text{Al}_2\text{O}_3$  reactors (**Fig. S2**) at room temperature.

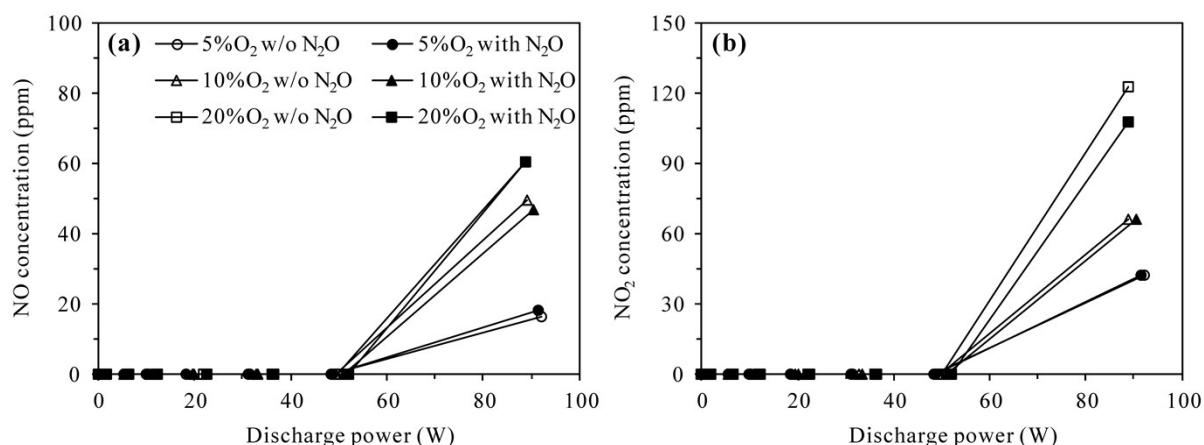

**Fig. S1** Effects of  $\text{N}_2\text{O}$  presence in  $\text{N}_2\text{-O}_2$  mixture on the production of (a) NO and (b)  $\text{NO}_2$  by discharge in plasma reactor at room temperature (inlet  $\text{N}_2\text{O}$ : 0 or 100 ppm;  $\text{O}_2$  content: 5%, 10% or 20%).

<sup>a</sup>Key Laboratory of Beijing on Regional Air Pollution Control, College of Environmental and Energy Engineering, Beijing University of Technology, Beijing 100124, China. E-mail: fanxing@bjut.edu.cn

<sup>b</sup>School of Space and Environment, Beihang University, Beijing 100191, China

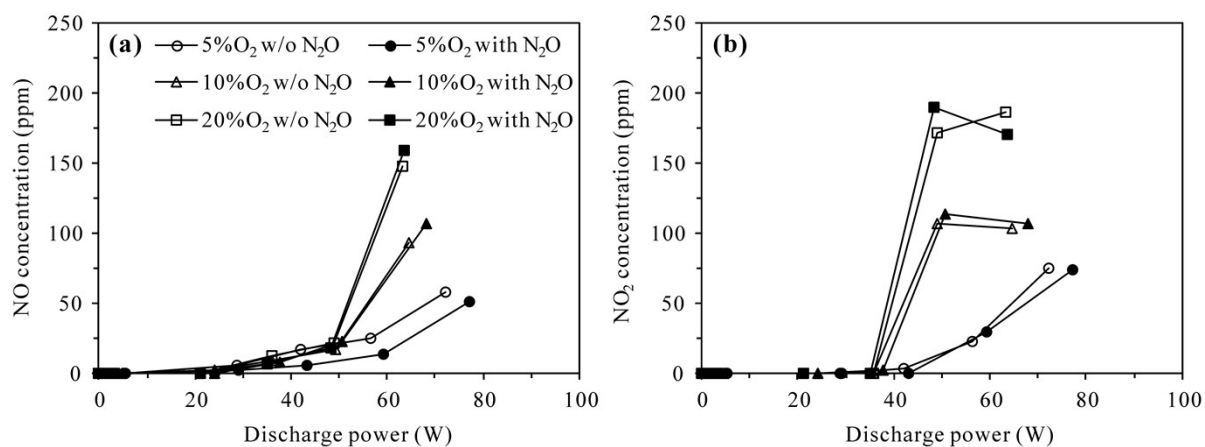

**Fig. S2** Effects of  $\text{N}_2\text{O}$  presence in  $\text{N}_2\text{-O}_2$  mixture on the production of (a)  $\text{NO}$  and (b)  $\text{NO}_2$  by discharge in plasma- $\text{Al}_2\text{O}_3$  reactor at room temperature (inlet  $\text{N}_2\text{O}$ : 0 or 100 ppm;  $\text{O}_2$  content: 5%, 10% or 20%).

### Figure S3

**Fig. S3** shows the FT-IR spectra of the reactor inlet and outlet gas for  $\text{N}_2\text{O}$  decomposition under  $\text{N}_2$  atmosphere at (a) room temperature and (b)  $300\text{ }^\circ\text{C}$ . It can be seen that besides the residual  $\text{N}_2\text{O}$ , no other nitrogen oxide species were detected during the plasma and plasma-catalytic decomposition of  $\text{N}_2\text{O}$  under  $\text{N}_2$  atmosphere regardless of the reaction temperature.

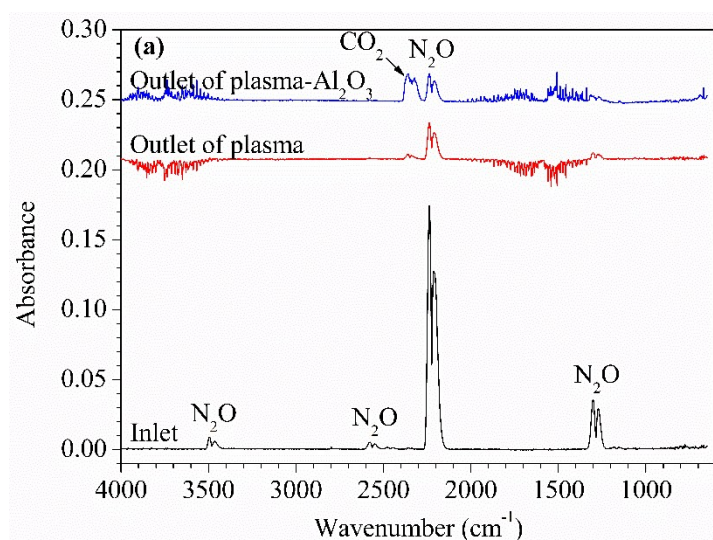

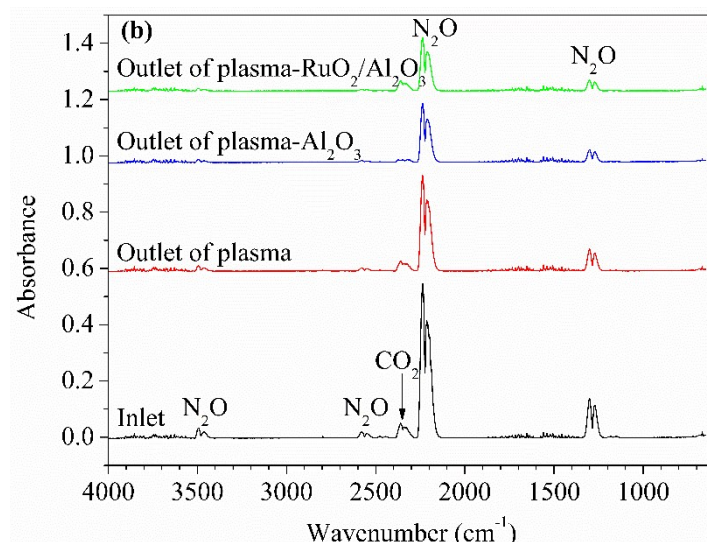

**Fig. S3** FT-IR spectra of the reactor inlet and outlet gas for N<sub>2</sub>O decomposition under N<sub>2</sub> atmosphere at (a) room temperature (inlet N<sub>2</sub>O: 100 ppm; discharge power: 72 W for the plasma process and 60 W for the plasma-Al<sub>2</sub>O<sub>3</sub> process) and (b) 300 °C (inlet N<sub>2</sub>O: 400 ppm; discharge power: 22 W for the plasma process and 34 W for the plasma-catalytic process).

## Figure S4

**Fig. S4** shows the FT-IR spectra of the outlet gas of (a) plasma, (b) plasma-Al<sub>2</sub>O<sub>3</sub> and (c) plasma-RuO<sub>2</sub>/Al<sub>2</sub>O<sub>3</sub> reactors with and without 400 ppm-N<sub>2</sub>O in the inlet gas (O<sub>2</sub> content 5%) and before and after discharge at 300 °C. It can be seen that discharge in N<sub>2</sub>-O<sub>2</sub> mixture at 300 °C produced N<sub>2</sub>O, NO and NO<sub>2</sub> as byproducts no matter the catalyst was introduced or not. When N<sub>2</sub>O was introduced into the N<sub>2</sub>-O<sub>2</sub> mixture, besides the residual N<sub>2</sub>O, NO and NO<sub>2</sub> were also detected at the outlet of plasma and plasma-catalytic reactors in the presence of discharge.

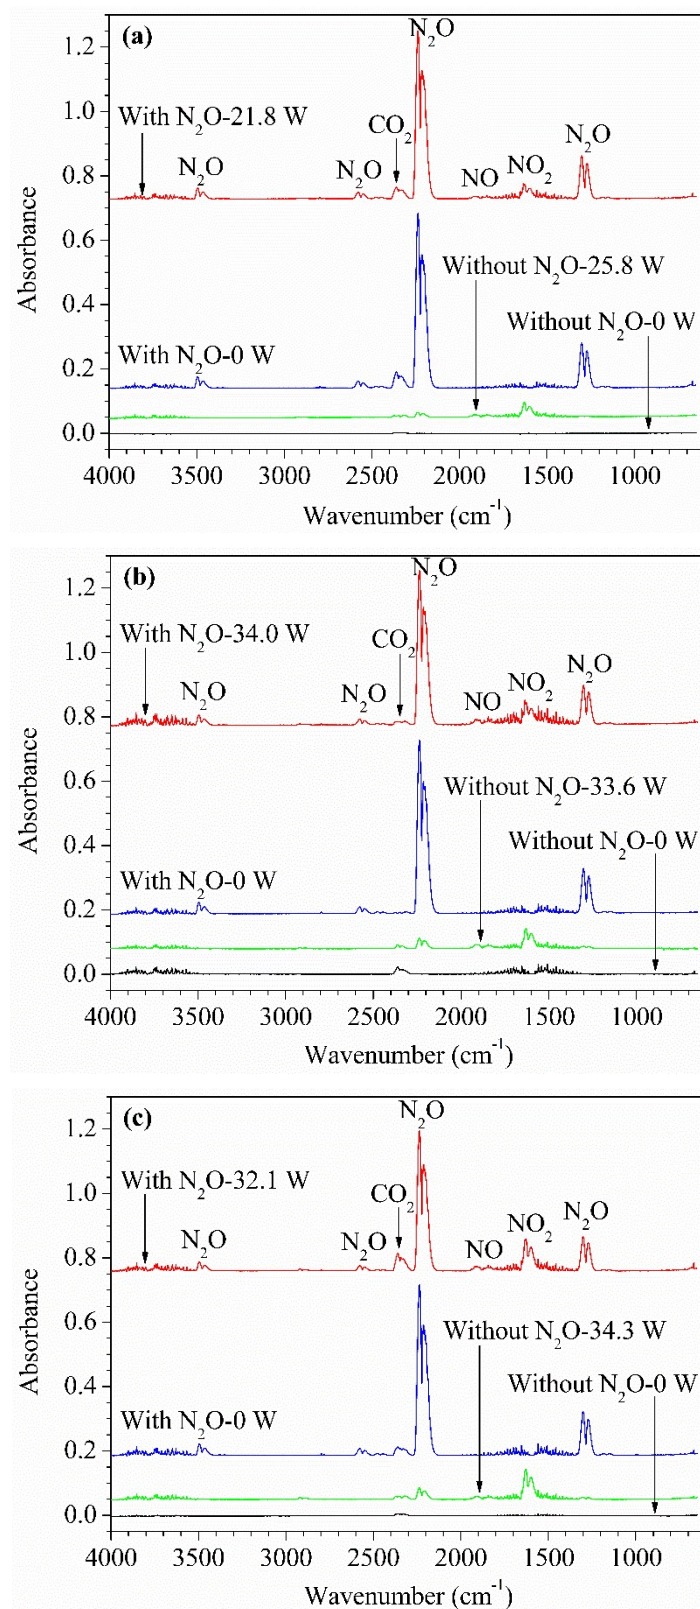

**Fig. S4** FT-IR spectra of the outlet gas of (a) plasma, (b) plasma- $\text{Al}_2\text{O}_3$  and (c) plasma- $\text{RuO}_2/\text{Al}_2\text{O}_3$  reactors with and without 400 ppm  $\text{N}_2\text{O}$  in the inlet gas and before and after discharge at 300 °C ( $\text{O}_2$  content: 5%).
